# Supplementary material for: Digital Twin based Sorting Optimization for Parcel Distribution Centers in Logistics Networks
Source: Research Square preprint supplement (doi:10.21203/rs.3.rs-6932705/v1), 2025-07-25
Supplement: Supplementary file 1 [file 4ef3ae91294903c43fb19eed.pdf]

# Digital Twin based Sorting Optimization for Parcel Distribution Centers in Logistics Networks

## SUPPLEMENTARY NOTE I: PORTION OF PARCELS TARGETED TO EACH DESTINATION OVER CONSECUTIVE DAYS

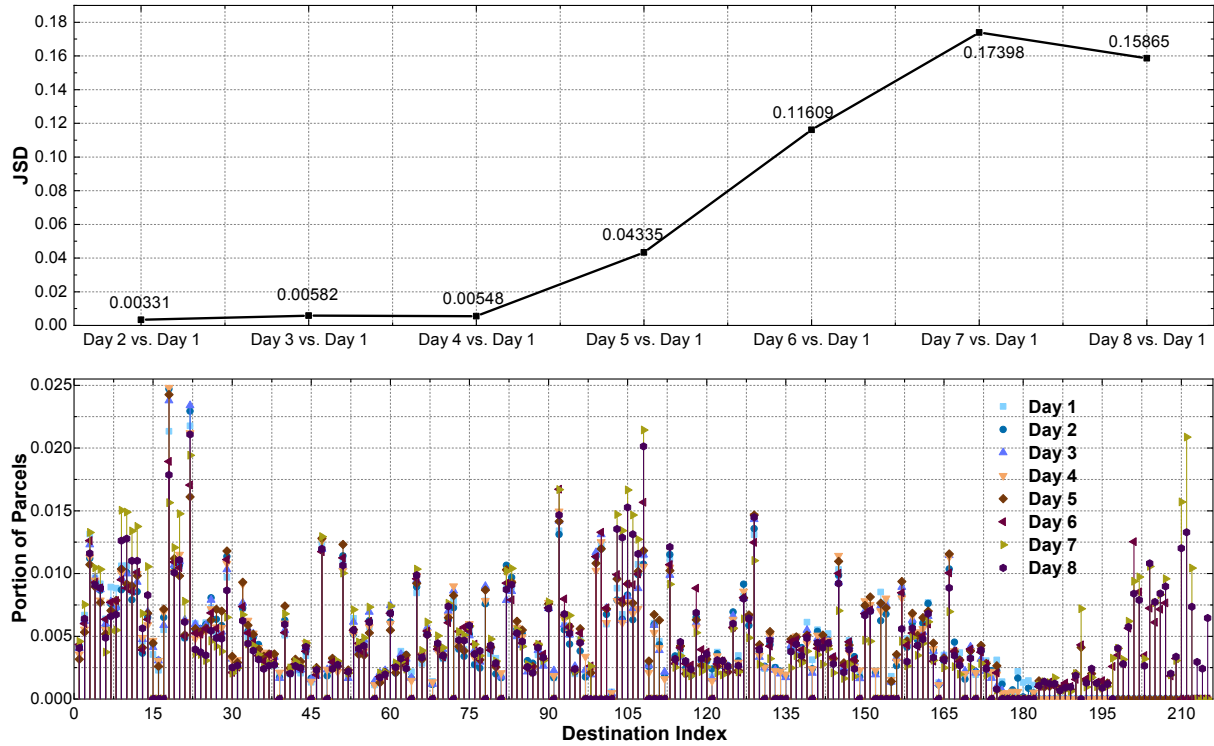

Fig. 1. Jensen-Shannon divergence (JSD) values quantifying the similarity in the portion of parcels targeted to each destination over consecutive days relative to Day 1. The first plot shows the JSD values comparing each subsequent day to Day 1. The second plot details the portion of parcels targeted to each destination over 8 consecutive days.

To quantify the similarity of the portion of parcels targeted to each destination across sorting shifts over consecutive days, we employ the Jensen-Shannon divergence (JSD) as the metric. Specifically, we denote the portion of parcels targeted to each destination on two

different days by  $\mathcal{P} = \{P_d\}_{d=1}^D$  and  $\mathcal{P}' = \{P'_d\}_{d=1}^D$ , where for each  $d \in \mathcal{D}$ ,  $P_d \geq 0$ ,  $P'_d \geq 0$ , and  $\sum_{d=1}^D P_d = \sum_{d=1}^D P'_d = 1$ . The JSD between  $\mathcal{P}$  and  $\mathcal{P}'$  is given as

$$\mathbf{JS}(\mathcal{P}||\mathcal{P}') = \frac{1}{2} \mathbf{KL}(\mathcal{P}||\mathcal{M}) + \frac{1}{2} \mathbf{KL}(\mathcal{P}'||\mathcal{M}), \quad (1)$$

where  $\mathcal{M} = \{M_d\}_{d=1}^D$  is the element-wise average portion of parcels targeted to each destination, with  $M_d = \frac{P_d + P'_d}{2}$ ,  $\forall d \in \mathcal{D}$ , and  $\mathbf{KL}(\cdot||\cdot)$  denotes the Kullback-Leibler (KL) divergence, i.e.,

$$\begin{aligned} \mathbf{KL}(\mathcal{P}||\mathcal{M}) &= \sum_{d=1}^D P_d \log \frac{P_d}{M_d}, \\ \mathbf{KL}(\mathcal{P}'||\mathcal{M}) &= \sum_{d=1}^D P'_d \log \frac{P'_d}{M_d}. \end{aligned} \quad (2)$$

The resulting JSD value, ranging from 0 (indicating identical distributions) to  $\ln 2 \approx 0.693$  (indicating maximum divergence), provides a quantitative measure of the similarity in the portion of parcels targeted to each destination across sorting shifts over consecutive days.

By analyzing the real-world parcel data from SF Express, as detailed in Fig. 1, we observe notably low JSD values during the initial consecutive days (Day 2 vs. Day 1: 0.00331, Day 3 vs. Day 1: 0.00582, Day 4 vs. Day 1: 0.00548), indicating minimal variation. However, the divergence progressively increases in subsequent days (Day 5 vs. Day 1: 0.04335, Day 6 vs. Day 1: 0.11609, Day 7 vs. Day 1: 0.17398, Day 8 vs. Day 1: 0.15865).

These results indicate that the portion of parcels targeted to each destination remains relatively similar over consecutive days, particularly within the initial days. Consequently, updating sorting plans on a three-day basis provides a practical balance between operational efficiency and deployment cost.

## SUPPLEMENTARY METHODS II: FIDELITY OF THE PSDTS

The fidelity of the proposed PSDTS is defined as the weighted average accuracy between the simulated and actual recorded number of sorted parcels over fixed-length time intervals throughout the sorting shift. Specifically, we first divide the sorting time of each sorting shift into  $Z$  fixed-length time intervals. In the  $o$ -th interval, we record the number of sorted parcels in the PSDTS as  $A^o$  and in the real-world as  $B^o$ , and calculate the parcel-count weight which corresponds to the fraction of simulated sorted parcels in interval  $o$  relative to the total

simulated sorted parcels, ensuring that time intervals with more sorted parcels contribute to the overall fidelity. The fidelity  $F$  is then defined as

$$F = \sum_{o=1}^Z \left( 1 - \frac{|B^o - A^o|}{\max\{B^o, A^o\}} \right) \frac{A^o}{A^{\text{all}}},$$

where  $A^{\text{all}}$  denotes the total simulated sorted parcels in the sorting shift.

### SUPPLEMENTARY METHODS III: SOLUTION SPACE ANALYSES

#### A. Solution space for problem (P1)

Given the number of destinations  $D$  and the number of grids  $X$ , the total number of solutions of problem (P1) is  $D^X$ . Considering each destination has to be assigned at least one grid, the number of valid solutions can be reduced to

$$D^X - \binom{D}{1}(D-1)^X + \binom{D}{2}(D-2)^X - \dots + (-1)^{D-1} \binom{D}{D-1},$$

by using the inclusion-exclusion principle, which can be simplified as

$$D^X + \sum_{k=1}^{D-1} (-1)^k \binom{D}{k} (D-k)^X.$$

#### B. Solution space for problem (P2)

The bounded assignment constraint in (8) requires  $\alpha_d \geq 1, \forall d \in \mathcal{D}$ . We introduce a change of variables  $y_d = \alpha_d - 1$ , so that  $y_d \geq 0$ . Substituting into the practical constraint

$$\alpha_1 + \alpha_2 + \dots + \alpha_D = X,$$

yields the equivalent form

$$y_1 + y_2 + \dots + y_D = X - D.$$

Therefore, the number of non-negative integer solutions to this equation is  $\binom{X-1}{D-1} = \frac{(X-1)!}{(D-1)!(X-D)!}$ .
